# 1 Synergism between Chromatin Dynamics and Gene Transcription 2 Enhances Robustness and Stability of Epigenetic Cell Memory

3 Zihao Wang<sup>1,2</sup>, Songhao Luo<sup>1,2</sup>, Meiling Chen<sup>1,2</sup>, Tianshou Zhou<sup>1,2,\*</sup>, and Jiajun Zhang<sup>1,2,†</sup>

4 1 Key Laboratory of Computational Mathematics, Guangdong Province

5 2 School of Mathematics, Sun Yat-Sen University, Guangzhou, 510275, P. R. China

6 [\\*mcszhtsh@mail.sysu.edu.cn](mailto:mcszhtsh@mail.sysu.edu.cn), [†zhjiajun@mail.sysu.edu.cn](mailto:†zhjiajun@mail.sysu.edu.cn)

7

## 8 Abstract

9 Apart from carrying hereditary information inherited from their ancestors and being able to pass on  
10 the information to their descendants, cells can also inherit and transmit information that is not stored  
11 as changes in their genome sequence. Such epigenetic cell memory, which is particularly important  
12 in multicellular organisms, involves multiple biochemical modules mainly including chromatin  
13 organization, epigenetic modification and gene transcription. The synergetic mechanism among  
14 these three modules remains poorly understood and how they collaboratively affect the robustness  
15 and stability of epigenetic memory is unclear either. Here we developed a multiscale model to  
16 address these questions. We found that the chromatin organization driven by long-range epigenetic  
17 modifications can significantly enhance epigenetic cell memory and its stability in contrast to that  
18 driven by local interaction and that chromatin topology and gene activity can promptly and  
19 simultaneously respond to changes in nucleosome modifications while maintaining the robustness  
20 and stability of epigenetic cell memory over several cell cycles. We concluded that the synergism  
21 between chromatin dynamics and gene transcription facilitates the faithful inheritance of epigenetic  
22 cell memory across generations.

## 23 INTRODUCTION

24 While cells carry information inherited from their ancestors and are able to pass on hereditary  
25 information to their descendants, they can also inherit and transmit information that is not stored as  
26 changes in their genome sequence. Such epigenetic cell memory, which is especially important in  
27 multicellular organisms, involves multiple biochemical modules, which can be roughly divided into  
28 three classes: chromatin organization [1], epigenetic modification [2] and gene transcription [3].  
29 Each of these three modules can impact the other two. For example, covalent modifications at  
30 histone amino N-terminal tails can impact high-order chromatin conformation by facilitating the  
31 contact between histones and DNA or inter-nucleosomal interactions [4,5]; In turn, spatial folding  
32 of chromatin is essential for enhancers to contact with distal specific promoters [6] and is also  
33 necessary for modified histones to spread their modifications to distant specific locus [7]. Chromatin  
34 dynamics (including chromatin organization and epigenetic modifications) can affect gene  
35 transcription and vice versa. For example, histone modifications occurring in the upstream area of  
36 a gene [8] can affect transcription factor (TF) access to regulatory sites [9] and further  
37 transcriptional initiation [10], thus impacting gene activity [11]. In turn, when bound to cognate  
38 regulatory sequences in gene regulatory elements, TFs either promote or suppress the recruitment  
39 of enzymes required for histone modifications [12] or chromatin remodeling [13]. In a word,  
40 relationships between the three modules are complex. Revealing these relationships is essential for  
41 understanding the robustness and stability of epigenetic cell memory.

42 Besides complex relationships, the three modules also behave on different timescales. Indeed,  
43 chromatin dynamic motion takes place on a timescale of seconds, whereas both epigenetic  
44 modifications and gene transcription occur on a timescale of minutes [14-21]. Thus, several  
45 important yet unsolved questions arise: whether or not there exists a synergetic interaction among  
46 the three modules, and how they dynamically collaborate to establish stable epigenetic memory  
47 patterns on multiple timescales, and what mechanisms govern the faithful inheritance of epigenetic  
48 memory over cell cycles.

49 Epigenetic modifications are essentially based on a “reader-writer-eraser” mechanism:  
50 functional enzymes “read” modifications and recruited enzymes then “write” spatially proximate  
51 histones [22,23]. Some studies showed that positive feedback loops [24] originated from the

52 “reader-writer-eraser” mechanism, and long-range interactions [25,26] based on chromatin loops  
53 are essential for maintaining stable epigenetic cell memory [23,27,28]. Because of distinct  
54 chromatin conformations, there is a significant difference in the process that TFs search for a  
55 specific target position on DNA to regulate transcription initiation [29]. This fact, together with the  
56 evidence that histone modifications regulate 3D genome organization [4], suggests that chromatin  
57 modifications can predict gene expression [30]. Since the mechanisms underlying chromatin  
58 dynamics are possibly the ones for some part of the whole genetic and epigenetic regulation process,  
59 the synergic mechanism among the above three modules remain elusive.

60 Recently, mathematical models of chromatin dynamics, which are based on polymer physics but  
61 focus on the form of topological associated domains (TADs), were developed to explain how  
62 epigenetic cell memory is established and maintained [27,28]. However, TADs can partially reflect  
63 the relationship between chromatin conformation and epigenetic modification, and do not consider  
64 the dynamics of cellular life activities that affect epigenetic regulation. Analysis of other models  
65 involving gene expression and DNA replication important for cellular development and proliferation  
66 indicated that transcription and cell division antagonizing and perturbing chromatin silencing play  
67 an important role in stabilizing epigenetic cell memory [31]. In spite of their own advantages, the  
68 existing models of genetic and epigenetic regulations reveal neither the mechanism of how the  
69 above three modules collaborate nor that of how epigenetic cell memory is robustly and stably  
70 maintained due to this synergism.

71 In this paper, we propose a multiscale model to investigate the synergetic mechanism between  
72 a wide range of regulatory elements. Specifically, this model considers three correlated modules:  
73 one for 3D chromatin organization including various possible chromatin conformations, another for  
74 epigenetic modification including stochastic transitions between epigenetic states, and another for  
75 gene transcription including modification-mediated gene expression and transcription-regulated  
76 silencing antagonism. The first module, which is described by a generalized Rouse model, behaves  
77 on a fast timescale whereas the latter two, which are described by several biochemical reactions,  
78 behave on a slow timescale. Stochastic simulations of the multiscale model indicate that the  
79 epigenetic cell memory can be robustly and stably inherited through cell divisions. And the results  
80 reveal that the synergism among chromatin organization, epigenetic modification and gene

81 transcription is essential for maintaining the faithful inheritance of epigenetic cell memory over  
82 generations.

83

## 84 **MATERIALS AND METHODS**

### 85 **Modeling framework**

86 Here we propose a strategy (in fact, a multiscale model) to model three coupled processes  
87 involved in gene expression: the formation of 3D chromatin conformations, epigenetic  
88 modifications, and gene transcription (Fig. 1). In the first process, chromatin is modeled as a chain  
89 consists of finite monomers (or beads) with each representing a nucleosome with a 3D position  
90 vector (Fig. 1a). This process also includes local and long-range interactions between nucleosomes.  
91 In the second process, epigenetic modifications including methylation and acetylation are classified  
92 as two different types: noise and recruitment modifications (Fig. 1b). The introduction of the third  
93 process is mainly because modifications affect transcription whereas transcription regulates  
94 silencing antagonism (Fig. 1c). Each of the three processes occurs on a different timescale. The  
95 elementary motion of chromatin is on a timescale from  $10^{-4}$  to  $10^{-2}$  (sec) [15]. Nucleosome  
96 modification dynamics based on the ubiquitous “reader-writer-eraser” mechanism is on a timescale  
97 of minutes [17,21]. And transcription occurring in discontinuous episodic bursts is on the timescale  
98 of about a minute (depending on regulation by enhancers) [18-20].

99 The above modeling strategy provides a possible framework for building 3D models and  
100 tracking cellular processes including transcription and cell mitosis over time (note: biological  
101 processes that rely on time-dependent dynamics is a 4D nucleome project [32,33]). Our multiscale  
102 model toward the 4D reality is a comprehensive investigation including the interpretation of  
103 mechanisms for the establishing and maintaining of stable epigenetic cell memory and the  
104 relationship between chromosome conformation, epigenetic modification and gene transcription.  
105 Although our model cannot accurately describe the reality of nucleolus epigenetic modifications in  
106 living organisms, it still captures the essential events occurring in gene-expression processes,  
107 including chromatin organization, epigenetic modifications, and gene transcription.

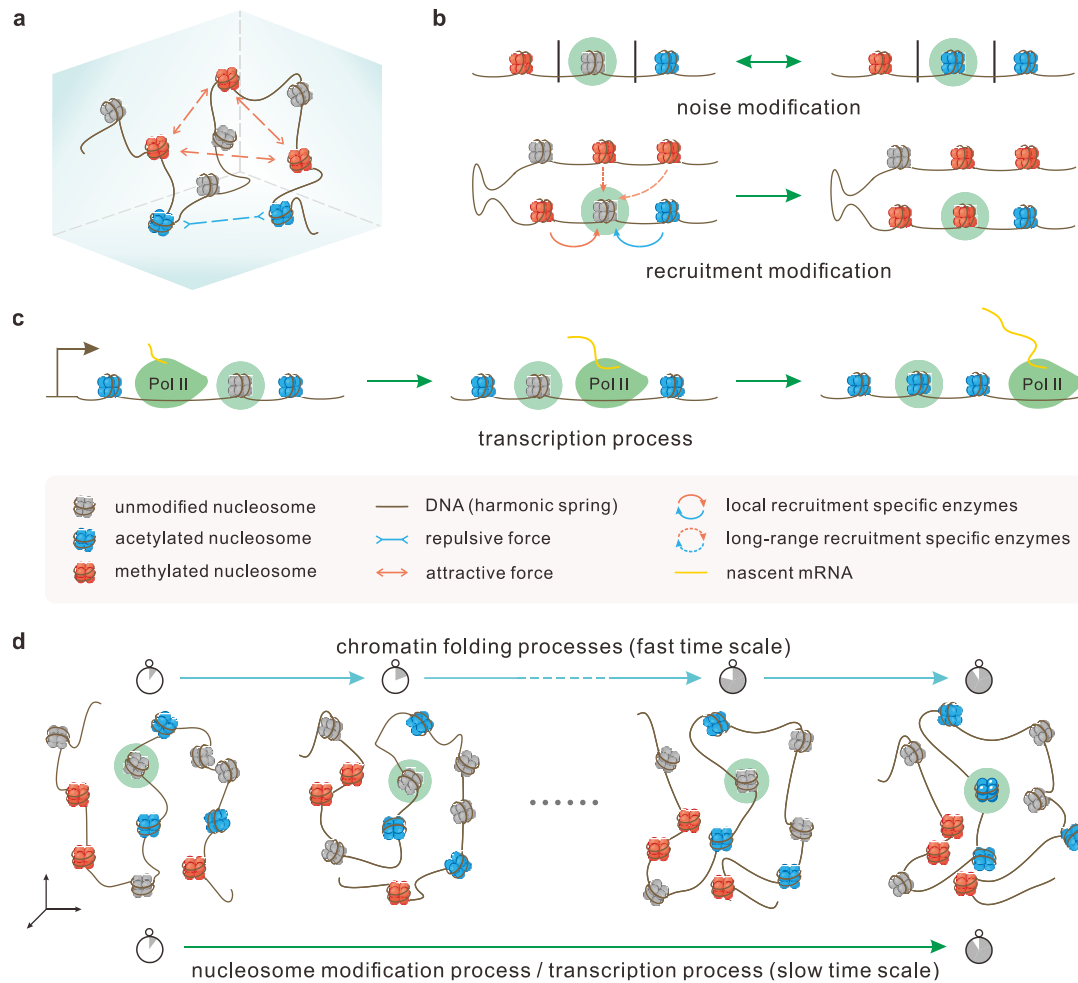

108

109 **Fig 1. Schematic representation of a multiscale model that considers the relationship among three**  
 110 **modules: chromatin organization, epigenetic modification, and gene transcription.**

111 **(a)** Schematic of 3D chromatin conformation. **(b)** Schematic of nucleosome modification regulation. Top  
 112 panel: noise can induce a modification reaction. The modification state of a nucleosome is independent  
 113 of its adjacent nucleosome states. Bottom panel: spatially adjacent nucleosomes have the ability to induce  
 114 a modification reaction by recruiting specific modification enzymes. The farther away the nucleosome  
 115 (marked by cyan shadow) is, the weaker is the effect. **(c)** Schematic of transcription process.  
 116 Transcriptional state characterized by the presence of Pol II can drive nucleosome acetylation and  
 117 demethylation. **(d)** Schematic representation of timescale differences among chromatin conformations,  
 118 nucleosome modification and gene transcription in 4D space.

119

## 120 Mathematical formulation

121 Chromatin is modeled as a polymer that is discretized into a collection of successive monomers

122 connected by harmonic springs. Assume that the chain consists of  $N$  monomers. Each bead on the  
123 chain represents a nucleosome with the 3D position denoted by  $P_i = (x_i, y_i, z_i)$ , where  $i = 1, \dots, N$ .  
124 We employ three kinds of multiple covalent modifications - acetylated (A, blue), unmodified (U,  
125 grey), and methylated (M, red) – to represent three possible epigenetic states of each nucleosome  
126 (Fig. 1), each denoted by  $S_i \in \{A, U, M\}$ , where  $i = 1, \dots, N$ . Thus,  $(P_i, S_i)$  contains the position  
127 and modification information of the  $i$ th nucleosome. Since the multiscale model can be  
128 considered as the coupling of two different timescales - Brownian polymer dynamics of a fast  
129 variable and epigenetic modification and transcription of a slow variable, we adopt two distinctive  
130 yet correlative approaches to deal with the cases of the two timescales. Details are described below.

### 131 ***Fast time scale***

132 The chromatin motion dynamics occur on a fast time scale. In our multiscale model, we use a  
133 generalized Rouse model with additional interacting beads (Fig. 1a and Fig. 2a) to describe the  
134 polymer structure. The conformational motion dynamics of the monomer  $P_i (i = 1, \dots, N)$  is  
135 represented by the Langevin equation or the stochastic differential equation (SDE) of the form [34]

$$136 \quad dP_i = -\nabla_{P_i} \Phi(P_1, S_1, \dots, P_N, S_N) dt + \sqrt{2D} d\omega_i, \quad (1)$$

137 where  $\Phi$  is the total potential of a given polymer conformation,  $D$  is the diffusion constant and  
138  $\omega_i$  is independent Gaussian noise with mean 0 and variance 1 in the 3D space. Chromatin structure  
139 dynamics evolve by the total potential  $\Phi$  that will be specified afterward.

### 140 ***Slow time scale***

141 Because of the fact that the chromatin conformation evolves much faster than nucleosome  
142 modification or gene expression (Fig. 1d), we can use a biochemical reaction system to describe  
143 slow variables in our model.

144 Each nucleosome in chromatin can be interconverted between epigenetic marks A, U and M. In  
145 general, a nucleosome with A (M) mark can be converted into M (A) state after the first mark has  
146 been removed to U (Fig. 2b) [23]. Each unmodified/modified process is considered a biochemical  
147 reaction. Thus, every nucleosome has four possible reaction channels - acetylation (ac), methylation  
148 (me), deacetylation (dea) and demethylation (dem). The corresponding biochemical reactions for  
149 the  $i$ th nucleosome ( $i = 1, \dots, N$ ) read

$$150 \quad \delta_{S_i,U} U \xrightarrow{r_{i,ac}} A, \delta_{S_i,U} U \xrightarrow{r_{i,me}} M, \delta_{S_i,A} A \xrightarrow{r_{i,dea}} U, \delta_{S_i,M} M \xrightarrow{r_{i,dem}} U, \quad (2)$$

151 where  $r_{i,R}$  is the rate of reaction  $R \in \{ac, me, dea, dem\}$  for the  $i$ th nucleosome and will be  
 152 discussed below,  $\delta_{i,j}$  (Kronecker delta symbol) is equal to 1 if  $i = j$  and 0 otherwise. There are in  
 153 total  $4N$  reactions in our biochemical reaction system consisted of  $N$  nucleosomes.

a Fast time scale

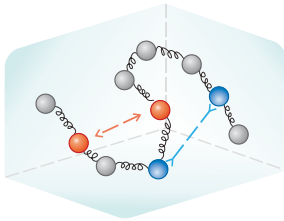

Chromatin motion

$$dP_i = -\nabla_{P_i} \Phi(P_1, S_1, \dots, P_N, S_N) dt + \sqrt{2D} d\omega_i \quad i \in \{1, 2, \dots, N\}$$

$$\Phi(P_1, S_1, \dots, P_N, S_N) = \phi_{Rouse}(P_1, \dots, P_N) + \phi_A(P_1, S_1, \dots, P_N, S_N) + \phi_M(P_1, S_1, \dots, P_N, S_N) \quad S_i \in \{A, U, M\}$$

b Slow time scale

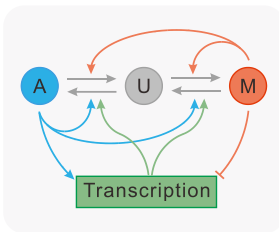

Nucleosome modification

$$r_{i,R} = \gamma_R + k_R(E_{i,R}^L + E_{i,R}^{LR}) \quad R \in \{ac, dea, me, dem\} \quad T \in \{L, LR\}$$

$$E_{i,R}^T = (\delta_{R,me} + \delta_{R,dea}) \sum_{j \in X_{i,R}^T} (\delta_{S_j, M} I F_j^M) + (\delta_{R,ac} + \delta_{R,dem}) \sum_{j \in X_{i,R}^T} (\delta_{S_j, A} I F_j^A)$$

Transcription

$$\mu = \mu_{min} + P_A (\mu_{max} - \mu_{min}) \quad P_A = \sum_{j=1}^N \delta_{S_j, A} / N$$

$$\text{with probability } P_{dem/ac} \text{ per nucleosome } j: \quad S_j \rightarrow \begin{cases} A & \text{if } S_j = U \\ U & \text{if } S_j = M \end{cases}$$

154

155 **Fig 2 Mathematical representation of the multiscale model.** (a) Mathematical model on a fast time  
 156 scale. Left panel is a diagrammatic representation of the generalized Rouse model. Right panel is a  
 157 mathematical equation of chromatin motion. (b) Mathematical model on a slow time scale. Left panel is  
 158 a diagrammatic representation of feedbacks, where symbols A, U, M are referred, respectively, to  
 159 acetylated, unmodified, methylated nucleosome state; grey arrows represent state conversions; colored  
 160 arrows represent feedback interactions. Right panel is a mathematical formula for nucleosome  
 161 modification and transcription. All symbols are described in the main text and Supplementary Table 1.

162 Next, we consider transcription. An important point is that the multiscale model considers the  
 163 relationship between transcription and chromatin epigenetic dynamics rather than the pathway how  
 164 transcription occurs and how translational proteins act on chromatin. For simplicity, here we use a  
 165 reaction to model transcription without considering the details of transcriptional burst on a slow  
 166 timescale. This reaction reads

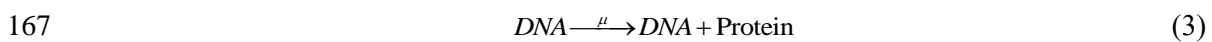

168 where  $\mu$  is the mean transcription rate and will be discussed below.

169 The multiscale model framework defined by Eqs (1-3) is a coupled stochastic hybrid system.

170 Previous studies have shown that an epigenetic regulation process is a complex and interrelated way  
171 [7,35], but the mechanism behind this process remains poorly understood. In contrast, our  
172 multiscale model proposes a feasible mathematical mechanism that, to some extent, can explain  
173 experimental phenomena and further draw qualitative conclusions as described in the abstract.  
174 Below we describe and elaborate on three different modules involved in our multiscale model.

175

## 176 **Three modules of the multiscale model**

### 177 **Module 1: 3D chromatin structure**

178 It is the motion of nucleosomes that makes chromatin have distinctive 3D organization at the  
179 population level. Clearly, in our multiscale model described by Eq (1), the chromatin motion is  
180 mainly affected by the total potential  $\Phi$  of a given polymer structure. In vivo, histone enriched in  
181 tri-methylations are linked to a higher condensed form of chromatin [36] and nucleosome  
182 acetylation state is associated with a less condensed organization [2]. Additionally, cell chemistry  
183 has shown that methylations do not change the charge of residues; yet, they alter the overall size of  
184 the modified amino acid residues. In contrast, acetylated nucleosomes have the ability to neutralize  
185 the positive charge of amino acid, thus inducing a less condensed conformation. These facts imply  
186 that the presence of different nucleosome modifications would have an important effect on the  
187 structure of chromatin. Presumably, besides the effective potentials between consecutive monomers,  
188 we add interaction forces mediated by the epigenetic marks in the generalized Rouse model:  
189 methylated marks attract to each other; acetylated marks are mutually repulsive; there is no  
190 interaction between unmodified monomers, but they can participate in epigenetic modifications (Fig.  
191 1a).

192 Thus, for a given conformation and epigenetics of a polymer, the total potential may be  
193 represented by

$$194 \quad \Phi(P_1, S_1, \dots, P_N, S_N) = \phi_{Rouse}(P_1, \dots, P_N) + \phi_A(P_1, S_1, \dots, P_N, S_N) + \phi_M(P_1, S_1, \dots, P_N, S_N), \quad (4)$$

195 where  $\phi_{Rouse}(P_1, \dots, P_N) = \frac{1}{2} \sum_{j=1}^{N-1} \kappa (P_j - P_{j+1})^2$  is an effective potential between consecutive  
196 monomers,  $\kappa$  is the stiffness of the spring,  $\phi_M(P_1, S_1, \dots, P_N, S_N) = \frac{1}{2} \sum_{j,k \in C_M} \kappa_M (P_j - P_k)^2$  and  
197  $\phi_A(P_1, S_1, \dots, P_N, S_N) = \frac{1}{2} \sum_{m,n \in C_A} \kappa_A (P_m - P_n)^2$  are energy potentials of methylated and acetylated



198 monomers respectively,  $\kappa_M, \kappa_A$  are the attractive and repulsive interaction coefficients,  $C_M$  and  
199  $C_A$  are the ensembles of indices for nucleosome methylation and acetylation. More details on the  
200 generalized Rouse model are given in Supplementary Note 2.

201

## 202 **Module 2: Transitions between epigenetic modification states**

203 Each nucleosome can dynamically transition between epigenetic marks A, U and M, according  
204 to Eq (2). In the following, we define the rates of biochemical reactions for transitions from two  
205 perspectives (Fig. 1b):

206 **I. Noisy modification.** Nucleosomes can be interconverted by noisy modification  
207 (corresponding to non-feedback processes), which is primarily due to the leaky enzymatic activity  
208 or the effects outside the region boundaries. More precisely, the nucleosome modification status is  
209 independent of the adjacent nucleosome states. We assume that the noisy modification rate of each  
210 nucleosome takes a constant or a certain proportion of recruitment modification. Specifically, we  
211 set noise rates  $\gamma_R, R \in \{ac, me, dea, dem\}$  at 5% [31] of the rate corresponding to recruitment  
212 modification  $k_R$ .

213 **II. Recruitment modification.** Nucleosomes can also be interconverted by recruitment  
214 modification (corresponding to feedback processes), which is related to the propagation of the  
215 epigenetic mark by recruitment of the enzymes corresponding to other locus. This process [37,38]  
216 forms positive feedback loops in the reaction scheme: nucleosomes with A or M modification recruit  
217 protein complexes to promote spreading of the state or erasing of the antagonistic mark. Here, we  
218 assume two types of feedbacks: (a) methylation (acetylation) state can promote the process from  
219 un-modification to methylation (acetylation); (b) methylation (acetylation) state can promote the  
220 process from acetylation (methylation) to un-modification (Fig. 2b). Yet, the mechanism and  
221 relationship between these two types of feedbacks are not clear. We hypothesize that the latter has  
222 a 10-fold reduced efficacy of the former [31], that is,  $k_{dea} = k_{me}/10$ ,  $k_{dem} = k_{ac}/10$ .

223 For the  $i$ th nucleosome, the spatial adjacent modified nucleosomes can participate in its  
224 recruitment modification, but the efficacy of modification decreases with increasing nucleosome  
225 separation [23,39]. We call the magnitude of modification efficiency an impact factor. There are  
226 two types of impact factors: the set  $X_i$  of methylated (or acetylated) nucleosomes around the  $i$ th

227 nucleosome affects its acetylated process to its methylated process or vice versa. Note that each  
228 methylated (or acetylated) nucleosomes in  $X_i$  has a corresponding impact factor  
229  $IF_j^S, j \in X_i, S \in \{M, A\}$  on the  $i$ th nucleosome (see discussions below). In fact, the value of  
230 impact factors is related to the structure of chromatin. Thus, we consider the spatial position of  
231 nucleosomes and decompose the recruitment modification in two distinctive contributions:

232 **(i) Local interaction (L).** Modification of a nucleosome is constrained to spread through its two  
233 nearest neighbors on the polymer chain. As shown in Fig. 1b (solid line), the enzymes recruited by  
234 the left or right nucleosome can work on the middle nucleosome. Certainly, such a restriction might  
235 also arise through steric limitation, which exists merely when adjacent nucleosomes meet. For each  
236 nucleosome, the impact factors of the left and right nucleosomes are  $IF_j^M = IF_j^A = 1$ .

237 **(ii) Long-range interaction (LR).** Chromatin motion including chromatin loops that bring  
238 distant loci into close spatial proximity [7] can form effective long-range interactions [24]. For a  
239 nucleosome, the nucleosomes in its adjacent spatial neighbors, not merely its nearest-neighbors  
240 along the chain, recruit specific enzymes and affect its change (Fig. 1b (dashed line)). In our model,  
241 we use the contact probability of two nucleosomes in space to approximately reflect the  
242 effectiveness of modification. Thus, we can assume that when the spatial distance between  
243 nucleosomes exceeds a certain value, the impact factor decreases, which is usually represented by  
244 a power law  $\propto d^{-3/2}$  [40], where  $d$  is the separation distance in the 3D space rather than the  
245 genomic distance. In addition, we know that higher methylation indicates increased chromatin  
246 compaction but higher acetylation expresses reduced chromatin compaction. Therefore, it is  
247 reasonable to set different spatial interaction gyration according to different modifications:  
248 acetylated (methylated) monomer has a larger (smaller) interaction threshold. The impact factor can  
249 thus be expressed as

$$250 \quad IF_j^S = \begin{cases} 1, & d \leq d_s \\ d_s^{3/2} / d^{3/2}, & d > d_s \end{cases}, S \in \{M, A\} \quad (5)$$

251 where  $d_s$  is the threshold of spatial interaction distance of the nucleosome in  $S$  state,  $d$  is the  
252 spatial distance between two nucleosomes.

253 Putting those together, the rate for the reaction  $R \in \{ac, me, dea, dem\}$  for the  $i$ th nucleosome

254  $(i = 1, \dots, N)$  is

$$255 \quad r_{i,R} = \gamma_R + k_R (E_{i,R}^L + E_{i,R}^{LR}), \quad (6)$$

256 where

$$257 \quad E_{i,R}^T = (\delta_{R,me} + \delta_{R,dea}) \sum_{j \in X_{i,R}^T} (\delta_{S_j,M} IF_j^M) + (\delta_{R,ac} + \delta_{R,dem}) \sum_{j \in X_{i,R}^T} (\delta_{S_j,A} IF_j^A), \quad T \in \{L, LR\}$$

258 is the sum over local and long-range interacting nucleosomes, and  $X_{i,R}^T$  is the set of local and long-  
 259 range interacting nucleosomes that recruit the corresponding enzymes to affect monomer  $i$  in  
 260 reaction  $R$ , and  $\gamma_R$  is the noise modification rate and  $k_R$  is the recruitment modification rate.

261

### 262 **Module 3: Modification-mediated gene expression and transcription-regulated silencing** 263 **antagonism**

264 There is evidence to support that TFs regulate gene expression partially by nucleosome  
 265 modifications [41,42]. However, the mechanistic basis of transcription dependence of modification  
 266 levels remains an open challenge. From experimental observations and previous models, we know  
 267 that A is an open conformation that the gene promoter is accessible to TFs and conducive for  
 268 transcription [2] (e.g., acetylated H3K9, H4K16), and M is the repressed chromatin state that is  
 269 assumed to be related to silencing [43,44] (e.g., methylated H3K9, H3K27) although not all  
 270 methylations suppress gene expression (or transcription) [45]. The reason we make this assumption  
 271 is that methylation and acetylation on the same nucleosome, such as H3K9 and H3K27 have distinct  
 272 states, thus it is convenient to compare methylation with acetylation. Additionally, we hypothesize  
 273 that the level of RNA production depends on the methylation or acetylation level. And the initiation  
 274 rate of transcription  $\mu$  is a simple linear function of the proportion of the number of acetylated  
 275 nucleosomes, that is,

$$276 \quad \mu = \mu_{\min} + P_A (\mu_{\max} - \mu_{\min}), \quad (7)$$

277 where  $P_A = \sum_{j=1}^N \delta_{S_j,A} / N$  is the proportion of acetylated marks,  $\mu_{\min} (\mu_{\max})$  is the minimum  
 278 (maximum) transcription initiation rate. Note that the 3D chromatin shape also impacts the gene  
 279 activity by limiting the accessibility of Pol II. The reason why we use epigenetic modification to  
 280 measure transcriptional activity is that transcription is measured more accurately by modification

281 on a slow timescale than by structure on a fast timescale. Structure and modification of chromatin  
282 are directly related as discussed above, so we assume that the interaction between structure and  
283 transcription is reflected in modification.

284 In addition, demethylation is associate with the fact that demethylase is located in the promoters  
285 and the coding regions of protein complexes for target genes [46,47]. Therefore, when transcription  
286 occurs, this promotes the transition of methylation state to an unmodified state [48]. Moreover, there  
287 is evidence to support that protein complexes involved in transcriptional activation lead to the  
288 identification of a large number of histone acetyltransferases [5], which can enhance the conversion  
289 of unmodified state to deacetylation state. Considering all the above facts, we model transcription  
290 as directly antagonizing epigenetic silencing [49,50] that causes removal of M state or add of A  
291 state (Figs. 1c and 2b). Therefore, we posit that each transcription is viewed as a discrete event that  
292 causes nucleosome demethylation and acetylation with probability  $p_{\text{dem/ac}}$ .

293

## 294 **Simulation method and statistics**

295 According to the above description, we use the above SDE (i.e., Eq. (1)) to simulate chromatin  
296 motion on a fast time scale and Gillespie stochastic algorithm [51] to simulate biochemical reactions  
297 (i.e., Eqs. (2) and (3)) on a slow time scale. The latter generates an exact pathway  $a$  and a time  
298 step  $\tau$  in the light of a number of reaction channels and the corresponding propensity functions.  
299 At each iteration,  $\tau$  corresponds to the typical time-scale of modeling (see Supplementary Note  
300 2). We hypothesize that the chromatin structure and modification state of the current moment  
301 determines when the next reaction occurs and which reaction will occur according to the Gillespie  
302 algorithm, as well as when the system time reaches the moment of the next reaction occurring so  
303 that the specific enzyme promotes the selected reaction (Fig. 1d and Supplementary Fig. 2). In  
304 addition, we use  $10^{-2}$  (sec) to represent the time step of chromatin folding.

305 When the cell reaches the end of the cell cycle with a timescale of 22 hours [52], DNA  
306 replication and cell division occur. We assume that de novo nucleosomes participate in the two  
307 copies of DNA, and both old and new nucleosomes are normally shared at random between two  
308 daughter chromosomes [53]. With this assumption, each nucleosome is replaced with a new  
309 unmodified nucleosome with a probability of 0.5. Numerical simulations are performed using a

310 home-made program (written in MATLAB). The whole system is simulated according to the  
311 flowchart in Supplementary Fig. 3. Snapshots of the system are taken every 300 seconds. Using the  
312 generated data, we then carry out a quantitative analysis.

313 The global epigenetic state is measured by calculating the epigenetic magnetization

314 
$$m = (n_M - n_A) / N, \quad (8)$$

315 where  $n_M$  ( $n_A$ ) is the number of methylated (acetylated) nucleosomes in the system. At a high  
316 magnetization, chromatin is filled with methylated nucleosomes so that the chromatin is dense.  
317 Pictorially, the radius of gyration takes the form

318 
$$R_g = \left[ (1/2N^2) \sum_{i,j} \langle R^2(i,j) \rangle \right]^{1/2}, \quad (9)$$

319 where  $R^2(i,j)$  is the pair-wise squared distances. The radius defined in such a manner can  
320 characterize the looseness of polymer in 3D space: It has a higher value when the polymer is an  
321 open (acetylated) conformation, and a lower value when it becomes a compact (methylated) globule.

322 Because of considering gene-expression reactions without considering the details of  
323 transcription and translation, we count the number of times for the occurrence of transcription in the  
324 interval of snapshots as the feature of gene activity.

325 Putting all the above details together, we have a novel theoretical model in which epigenetic  
326 gene regulation and chromatin architecture are mechanistically integrated on different timescales.  
327 This 4D multiscale model actually gives a method of mapping the structure and dynamics of  
328 chromatin in space and time, thus gaining deeper mechanical insights into how epigenetics is  
329 maintained after several cell cycles and what mechanisms enable the three modules to work together  
330 dynamically. More details of the model and values of the parameters used in the simulation are given  
331 in Supplementary Information.

332

## 333 RESULTS

334 To explore the power of the above multiscale model in painting 1D epigenetic information, 3D  
335 chromatin structure and gene transcription, we examine a system consisting of  $N = 60$   
336 nucleosomes that corresponds, typically, to a small domain (~12 kb of DNA). To simplify, the  
337 simulation region is isolated from neighboring the DNA by boundary insulator elements [54,55].

## 338 **Chromatin organization driven by long-range interaction can enhance epigenetic** 339 **cell memory and its stability**

340 Note that our model explicitly considers the chromatin spatial structure and the accurate  
341 dissection of the 3D contributions to nucleosome modifications (Eqs. (2) and (6)) (Fig. 3a).  
342 Therefore, the questions we first want to answer are what role chromatin organization plays in  
343 maintaining epigenetic cell memory in the sense of gene expression and stability of chromatin status,  
344 and how chromatin folding properties affect epigenetic processes. For this, we consider a controlled  
345 system without long-range epigenetic modifications. In other words, the dynamics of epigenetic  
346 modification do not depend on the folding of the chain, and the question thus reduces to a simpler  
347 1D one. For this controlled system, Eq. (6) reduces to  $r_{i,R} = \gamma_R + k_R E_{i,R}^L$ .

348 To maintain epigenetic cell memory in the sense of gene expression, the modified chromatin  
349 must have the ability to maintain epigenetic patterns - high acetylation (low transcription) and high  
350 methylation (high expression) states - for several cell cycles. If a model is capable of sustaining both  
351 high-M state and high-A state under the same conditions, it is bistable. In order to better characterize  
352 this property, we perform a set of simulations over a range of parameter values to calculate the  
353 balanced bistability  $B = 4P_M P_A$  [56] (see Supplementary Note 3), where  $P_M$  or  $P_A$  is the  
354 probability that the system is in one of the epigenetic states. If  $B$  approaches to 1, the system is  
355 bistable.

356 By simulations, we find that the system exhibits weak bistability without long-range epigenetic  
357 modifications (Fig. 3b) but strong bistability with both local and long-range interaction (Fig. 3c). If  
358 either methylation rate  $k_{me}$  or acetylation rate  $k_{ac}$  is much larger than the other, the system cannot  
359 exhibit bistability. With increasing acetylation rate  $k_{ac}$ , the minimum  $k_{me}$  for bistability is  
360 observed to increase. This is because the replacement rate of the methylated nucleosome is not  
361 quickly enough to counteract demethylation, acetylation, transcription and DNA replication. Since  
362 transcription antagonizes silencing, this promotes the process from acetylation to methylation.  
363 Therefore, the bistability is observed almost in the region where the methylation rate is bigger than  
364 the acetylation rate. In short, if the process from acetylation to methylation and the process from  
365 methylation to acetylation can be balanced, the system can be bistable, indicating that the chromatin  
366 can store both active and repressive epigenetic memory, and inherit epigenetic states for several cell

367 cycles.

368 We calculate the average number of the modified nucleosomes that can influence modification  
369 around an unmodified nucleosome (Fig. 3d). Then, we find that without long-range epigenetic  
370 modification, the average number is 1.5, and the number for 3D chromatin is as high as 8.5. This  
371 implies that the long-range interaction brings about seven modified nucleosomes caused by the  
372 chromatin motion as shown in Fig. 3a. Thus, we can draw the conclusion that the structure of  
373 chromatin has a great influence on the modification of nucleosomes by enhancing and reinforcing  
374 epigenetic cell memory.

375 Let us explain the effect of chromatin folding from another more intuitive perspective. For this,  
376 we simulated our model using different values of methylation and acetylation rates starting from the  
377 initial repressed state, and calculated the mean first passage time (MFPT) for switching from a M  
378 macro-state  $m = 1$  to an A state ( $m < 0$ ) (see Supplementary Note 3). Fig. 3e and Fig. 3f show the  
379 heatmaps of the MFPT in the presence and absence of long-range effect, respectively. We observe  
380 that a larger methylation rate leads to a higher MFPT. On the contrary, a larger acetylation rate  
381 results in a lower MFPT. Moreover, the epigenetic system is extremely unstable without the long-  
382 range crosstalk (Fig. 3e). The introduced-above effective long-range interaction can stabilize large-  
383 scale epigenetic states dramatically (on average, more than 4-fold compared to the case of the local  
384 spreading model) (Fig. 3f). By comparing Fig 3c and Fig. 3f, we find that in 50 cell cycles  
385 methylation state does not switch to acetylation state in the bistable region, showing the robustness  
386 of the epigenetic cell memory. Fig. 3g shows the result of a stochastic simulation without long-range  
387 interaction, whereas Fig. 3h shows the result of another stochastic simulation with long-range  
388 interaction. In the two cases, the parameter values are the same, but the repressed state is erratic and  
389 biased to the acetylation state for several cell cycles. We can see that the epigenetic cell memory is  
390 more unstable without long-range interaction, and the shorter time for transiting to an active state.  
391 This means that the 3D spreading of a mark leads to the spontaneous formation of a more stable  
392 epigenetic coherent phase, implying that 3D chromatin conformations are important for stabilizing  
393 epigenetic heritage.

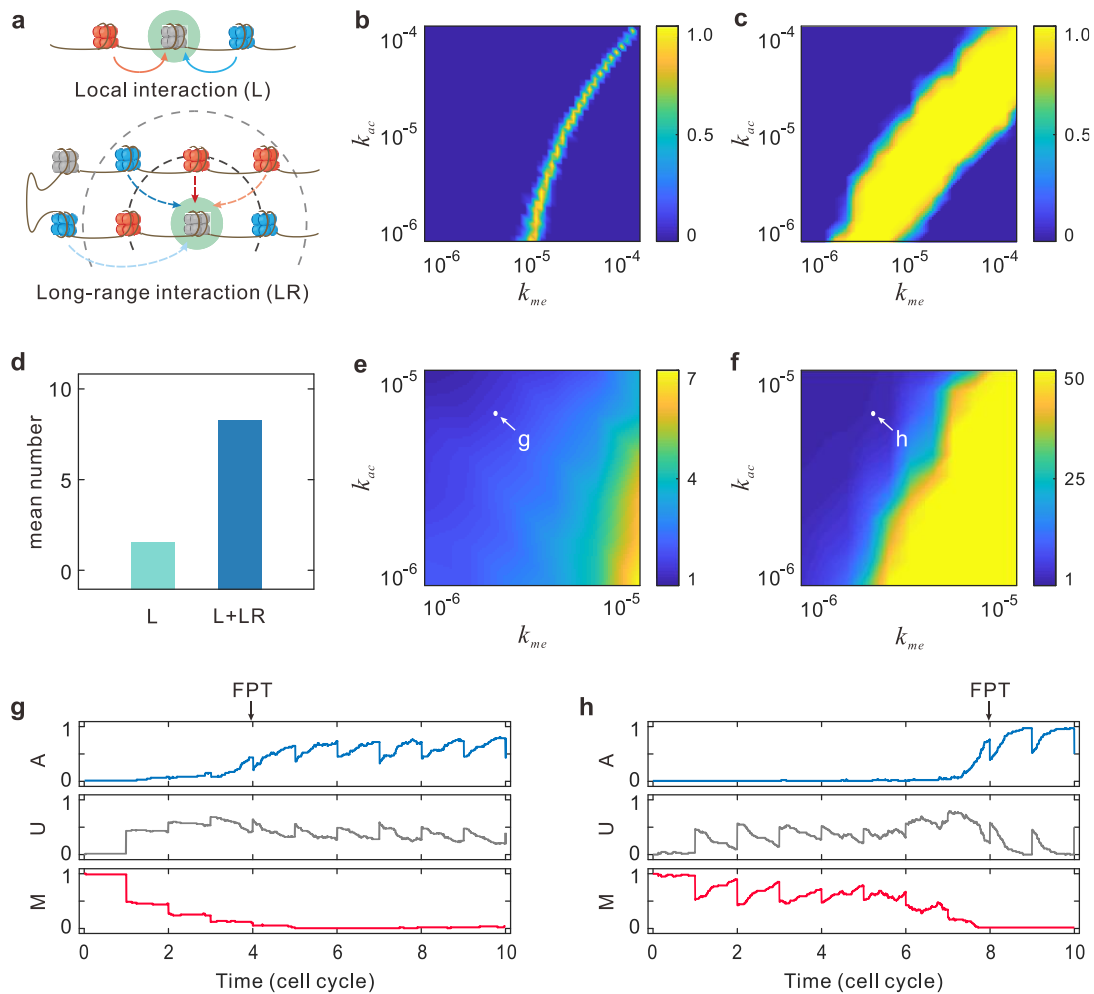

394

395 **Fig 3 Effect of chromatin organization on epigenetic cell memory.**

396 **(a)** Schematic representation of two distinctive interactions. Top row: local interaction, where  
 397 modification of a nucleosome spreads through its two nearest neighbors along the chain. Bottom row:  
 398 long-range interaction, where modification of a nucleosome spreads through its adjacent spatial  
 399 neighbors. The impact efficacy decays with increasing spatial distance (with a lighter dashed line). **(b)**  
 400 Heatmap, showing that bistability measured by quantity  $B$  is taken as a function of methylation rate  
 401  $k_{me}$  and acetylation rate  $k_{ac}$  without long-range interaction. For each set of parameter values, 100  
 402 simulations are initialized in each of the uniform methylation or acetylation states, and 50 cell cycles are  
 403 considered. Results are obtained by averaging over all simulations. **(c)** Heatmap similar to (b) but for  
 404 long-range interaction. **(d)** The average number of modified nucleosomes around an unmodified  
 405 nucleosome under the situation that long-range effects are present or absent. **(e)** Heatmap for the local  
 406 spreading model of the MFPT  $t_{FP(M)}$  for switching from the methylation state to acetylation state as a  
 407 function of  $k_{me}$  and  $k_{ac}$ , which is obtained by averaging over 100 simulations for each of 50 cell cycles.



408 **(f)** Heatmap similar to (e) but for the long-range spreading model, where two points indicated by (g) and  
409 (h) are used in detailed analysis. **(g)** An example for stochastic simulation of the levels of modified and  
410 unmodified nucleosomes with initial uniform methylated state overtime for an acetylation-biased local  
411 spreading model, where parameter values are  $k_{me} = 2 \times 10^{-6}$  and  $k_{ac} = 6 \times 10^{-6}$ . **(h)** An example similar  
412 to (g) but for an acetylation-biased long-range spreading model.

413

### 414 **Chromatin structure and gene activity can promptly and simultaneously respond** 415 **to changes in modification**

416 Here we examine the effect of directly changing the modification rates on chromatin states. Our  
417 strategy is that we first simulate the model with  $k_{me} = 7 \times 10^{-6}$  and  $k_{ac} = 7 \times 10^{-6}$ , starting from the  
418 active state after equilibration for ten cell cycles, and then change  $k_{ac}$  to observe the epigenetic  
419 kinetics (Fig. 4a and Fig. 4b). We observe that if the alternation of  $k_{ac}$  is small, e.g.,  $k_{ac} = 1 \times 10^{-6}$   
420 (Fig. 4a), the epigenetic state does not change but produces controllable fluctuations, indicating the  
421 robustness of stable memory. If  $k_{ac}$  is altered to  $k_{ac} = 1 \times 10^{-7}$  at  $t = 0$ , Fig. 4b shows a simulation  
422 where the stable high A modification coverage becomes unstable and biases toward M modification.

423 Clearly, we should consider the impact on structure and gene activity under the chromatin state  
424 transition rather than under the stable state. Additionally, since there are fluctuations and  
425 differentiations in gene-expression frequency and chromatin size for once simulation and the FPT  
426 of each simulation is different, we simulate several times and then select simulations with roughly  
427 the same FPT and calculate the mean value of the radius of gyration  $R_g$ , magnetization  $m$  and  
428 gene activity, which can be represented as the characteristics of structure, epigenetic, and function  
429 of chromatin, respectively.

430 At the initial four cell cycles in Fig. 4c, the  $R_g$ ,  $m$  and gene activity is regular with the time  
431 evolution. In each cell cycle, the magnetization is about  $-0.5$  because of dilution at DNA  
432 replication at the beginning, and is then reduced to  $-1$  gradually with the spread of epigenetics.  
433 Meanwhile, the chromatin structure is gradually slackening to facilitate the binding of  
434 transcriptional enzymes. Thus, the expression of the gene is stably active and the level of acetylation

435 determines the level of the expression according to Eq (7).

436 We can see that if the parameter  $k_{ac}$  is altered to  $k_{ac} = 1 \times 10^{-7}$  at  $t = 0$ , the  $R_g$ ,  $m$  and gene  
437 activity responds, immediately, to the alteration of the epigenetic rate. At the end of the 1<sup>st</sup> cell cycle  
438 that has changed the rate, the  $m$  does not recover to  $-1$ , even though the number of acetylated  
439 nucleosome has a slight increase (Fig. 4b) due to the effect of positive feedback loops of acetylated  
440 states and the effect of transcription (Fig. 2b). Meanwhile, in one cell cycle, the  $R_g$  and gene  
441 activity is also responded promptly (Fig. 4c).

442 The cell has the tendency to be methylated and turns to steady high M coverage at the 8<sup>th</sup> cycle  
443 (Figs. 4b and 4c). The intermediate part can be viewed as a short window, in which the system can  
444 switch from high A to high M modifications. We can see that in this window, the amplification of  
445 M on the whole is simultaneously accompanied by the decrease of  $R_g$  and gene activity in multiple  
446 cell cycles (Fig. 4c). At the beginning period of the window, the number of acetylated nucleosomes  
447 is decreasing with increasing unmodified in multiple cell cycles. In the latter period of the window,  
448 the number of acetylated labels decreases drastically, triggering a rapid rise of methylation. Thus,  
449 the  $m$  is progressively increasing and clusters of methylated modifications emerge at the end of  
450 short window. At the same time, we can find that  $R_g$  gradually attenuates and the chromatin  
451 condenses fairly slowly, which persists for several cell cycles. Fig. 4c shows typical snapshots of  
452 3D shapes, which entirely display the switching process from state A to M. On average, the gene  
453 activity is gradually decreasing due to the level of acetylation and spatial condensing of chromatin  
454 (Fig. 4c).

455 When the system turns to steady methylation, the gene is almost silent through the whole cell  
456 cycles due to little acetylation. Moreover, in a cell cycle, the methylated nucleosomes accumulate,  
457 resulting in an increasing global epigenetic modification and a decreasing radius of gyration.

458 In summary, we find an interesting phenomenon: the number of acetylated nucleosomes is  
459 decreasing with reducing transcription probability and shrinking the radius of gyration, and vice  
460 versa. This phenomenon would imply that a cell has the ability to alter its state in response to  
461 external changes and that chromatin structure and gene activity can simultaneously and immediately  
462 respond to the changes in modification rates.

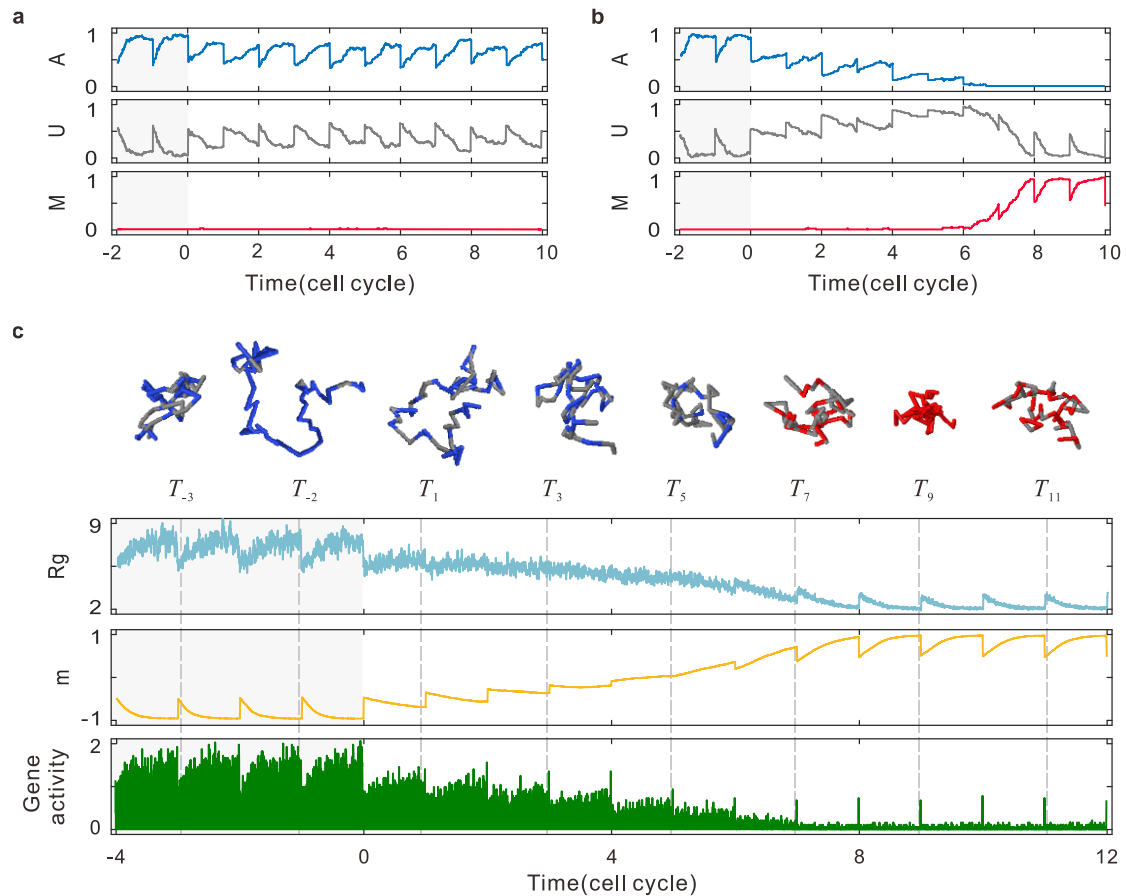

463

464 **Fig 4 Responses of chromatin structure and gene activity to changes in nucleosome modification.**

465 **(a)** The time evolution of the levels of modified and unmodified nucleosomes, where after initialization

466 of uniform methylated state for ten cell cycles (two of them are shown) with  $k_{me} = 7 \times 10^{-6}$  and

467  $k_{ac} = 7 \times 10^{-6}$ , parameter  $k_{ac}$  is changed to  $k_{ac} = 1 \times 10^{-6}$  at time  $t = 0$ . In spite of this perturbation of

468  $k_{ac}$ , the chromatin state are still maintained for several cell cycles. **(b)** Except for  $k_{ac} = 1 \times 10^{-7}$  at  $t = 0$ ,

469 the other parameter values are kept the same as (a). Following this perturbation, the chromatin state turns

470 to the active state and persists for several cell cycles. **(c)** Top row: Typical snapshots of 3D structures by

471 once simulation, where the polymer is taken as a function of time,  $T_i$  represents a certain time in the

472  $i$ th cell cycle,  $T_{-3}$  and  $T_{11}$  represent the initial stages of cell cycles and other  $T_i$ s represent the final

473 stages. Bottom rows (2-4): The time evolution of the average values of radius gyration  $R_g$ , epigenetic

474 magnetization  $m$  and gene activity with multiple simulations. Conditions change but parameter values

475 are the same as (b).

476

## 477 **A synergetic self-organization strategy for genetic and epigenetic regulations**

478 The above results indicate that three modules of our model – dynamic spatial motion of  
479 chromatin, stable epigenetic modification and genetic function of chromatin - can simultaneously  
480 make dynamic and timely adjustment, in face of internal and external noise from, e.g., alterations  
481 in modification rates. This suggests that the synergy among these three modules can regulate genetic  
482 and epigenetic processes.

483 In order to explain the possibility of such a synergy or the rationality of such a strategic  
484 mechanism, we simulate a wide range of parameters of  $k_{me}$  and  $k_{ac}$  over 100 simulations for each  
485 of 50 cell cycles, and record the nucleosome position and modification information at the end of  
486 each cell cycle and the mean gene activity in the last hour of each cell cycle. Then we calculate the  
487 Pearson correlation coefficients between the radius of gyration  $R_g$ , magnetization  $m$  and gene  
488 activity. Note that this coefficient describes the covariation of two random variables, and takes a  
489 value between -1 and 1.

490 We observe a strong positive correlation between chromatin organization and expression level  
491 (Fig. 5a,  $r = 0.65$ ) and a strong negative correlation (Fig. 5b,  $r = -0.73$ ) between chromatin  
492 structure and nucleosome modification level. High coefficients represent that the information of  
493 chromatin organization is promptly transferred to the gene function and chromatin modification to  
494 adjust the epigenetic process. In the cases of long-range interaction and no long-range interaction,  
495 Fig. 3 has partially shown that the information on chromatin structure can affect the modification  
496 process. Two strong negative correlations in Fig. 5b and Fig. 5c ( $r = -0.88$ ) suggest that a different  
497 nucleosome modification level can induce a distinct gene expression pattern and adjust the spatial  
498 folding of epigenomes simultaneously and promptly. Fig. 4 has shown a complete process from  
499 stable acetylation to stable methylation, which is caused by the alteration of modification rate and  
500 is accompanied by the changes of gene activity and organization. Fig. 5a and Fig. 5c also suggest  
501 that the transcriptional events can influence nucleosome modification and chromatin structure. In  
502 multicellular organisms, these correlations might be derived from a variety of enzymes in the  
503 cellular activity. In fact, an enzymatic reaction or a binding behavior trigger a cascade of molecular  
504 events that affect the function or action of the cell. Thus, we can conclude that in the combination  
505 modeling of fast and slow time scales, any two of the three modules are correlative and even strongly

506 correlative as shown in Fig. 5. These correlations occur due to the effect of the long-range interaction,  
507 but they will become weaker if the long-range interaction is not considered (or if the only local  
508 interaction is considered) (referring to Supplementary Fig. 4). Therefore, we conclude that the long-  
509 range interaction rather than the local interaction is a key factor for the synergism among chromatin  
510 structure, epigenetic modification and gene activity to maintain the stable epigenetic cell memory.

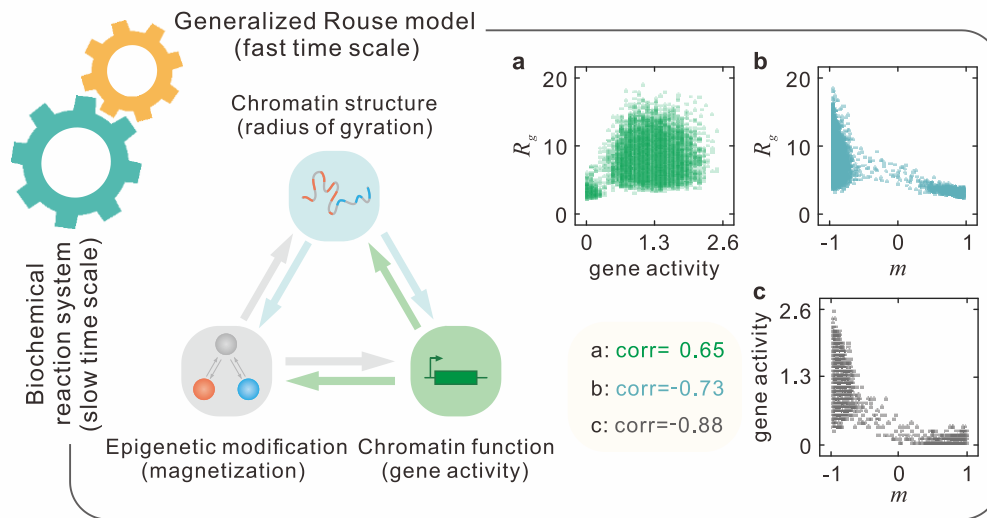

511

512 **Fig 5 A multiscale dynamical model for the synergism among chromatin structure, epigenetic**  
513 **modification and gene activity**, where “corr” represents the Pearson correlation coefficient  
514 between two random variables.

515 In addition, in our multiscale model, the associated methylation or acetylation labels favor  
516 chromatin self-attractive or self-repulsive interactions, and these, in turn, drive the formation of  
517 distinct structure through updating the energy potential of the system. These different conformations  
518 might influence the communications of different marks via long-range interaction and the diffusions  
519 of specific enzymes binding to enhance transcription. According to cell biology and biophysics, we  
520 know that the alternative modified nucleosomes suffering the positive feedback mechanism result  
521 in a regulated expression process through tuning transcription rate. In turn, transcription urges the  
522 transition from methylation to acetylation via discrete turnover events in order to sustain the positive  
523 feedback of gene activity, and further drives the folding of the polymer to some extent. Finally, the  
524 interaction between chromatin structure and gene transcription is reflected by modification, not only  
525 because they are all related to modification but also because transcription and structure are at  
526 different timescales. It should be pointed out that the described-above relationships among

527 chromatin structure, epigenetic modification and chromatin function hold for multi-generations.  
528 Therefore, we can conclude that the synergism among the three modules shapes a stable genetic  
529 and epigenetic network (Fig. 5).

530

## 531 **DISCUSSION**

532 In this paper, we proposed a multiscale stochastic model to investigate the robustness and  
533 stability of epigenetic cell memory. This model focuses, especially, on the cooperative interaction  
534 among chromatin spatial motion, stable epigenetic modifications and chromatin genetic function (in  
535 fact, gene activity). It provides a formalism of realistic biological processes in which enzyme  
536 modifications and transcription occur on a slower timescale than chromatin spatial folding. In spite  
537 of the difference in timescale, the mentioned-above modules can collaborate (Fig. 5) to drive and  
538 even control cell fate determinations through a stable genetic and epigenetic networks.

539 Previous studies showed that long-range epigenetic modifications can facilitate nucleosome-  
540 nucleosome communication and histone modification propagation [7], and control gene expression  
541 [57]. For example, an acetyltransferase is recruited to the enhancer, which triggers the increase of  
542 H3K27 acetylation at the promoter and subsequent transcription [58]. And in *Drosophila*  
543 *melanogaster*, temporal and spatial expression of Hox genes during development depends on  
544 Polycomb group proteins and on the long-range contacts between the Hox locus and distal specific  
545 enhancers [59]. In contrast, here we have shown that the long-range interaction can reinforce the  
546 stability and robustness of epigenetic cell memory over several cell cycles.

547 How chromatin state and gene activity respond to changes in epigenetic modification is a fully  
548 unsolved issue in the field of molecular biology. First, cells have the ability to sense and adapt to  
549 environmental changes. Second, small external noise is not sufficient to destroy epigenetic cell  
550 memory due to the coherent formation of epigenetic modification. This machinery may endow  
551 regulatory networks with enhanced robustness. However, when external noise is large such as  
552 climate cycle in spring or winter and artificially increased enzyme concentrations in experiments,  
553 the chromatin-based noise filtering machinery cannot completely eliminate the noise impact. Thus,  
554 jumping into an alternative landscape epigenetic state due to the noise effect will occur with a large  
555 probability (this corresponds to the plasticity of cells [60]), e.g., vernalization in *Arabidopsis* centres

556 on the *FLC* gene [61]. Exposing to the prolonged cold of winter, the *FLC* gene, a repressor of  
557 flowering, fills with acetylated nucleosomes [62,63], and after vernalization, the expression of *FLC*  
558 is stably repressed and the plants has the ability to flower with the modification biasing towards  
559 methylation. In our modeling framework, changes in modification rates or other parameters such as  
560 the transcriptional initiation rates model can be considered as exogenous stimuli. Thus, our model  
561 has plasticity and extendibility. Moreover, we have shown that chromatin state and gene activity  
562 respond, promptly and simultaneously, to changes in modification rates.

563 The synergism among chromatin organization, histone modification and gene transcription is  
564 critical for the maintenance of stable epigenetic cell memory. For example, when the  $\beta$ -globin locus  
565 is located in a highly acetylated environment, it will increase the sensitivity to DNase so that the  
566 chromatin structure can have universal accessibility [64]. The synergism is also important for  
567 chromatin states switching in face of complex external environments, e.g., the vernalization in  
568 *Arabidopsis* centres on the *FLC* gene discussed above. However, if the synergism is broken or if  
569 any one of the three modules does not work, modified marks cannot be spread orderly, leading to  
570 the epigenetic instability that would further lead to pathological problems. For example, if failing  
571 to propagate to offspring due to abnormal gene expression pattern or defective replication or  
572 mutations in modification enzymes, the epigenetic information would lead to irregular  
573 developmental programs and event to tumorigenesis, cancer, cellular senescence and apoptosis [65].  
574 Our multiscale model can well reveal the essential mechanism of the synergism even in a more  
575 realistic case. In particular, our result on the synergism indicates that through the synergism among  
576 histone modification, chromatin organization and gene transcription, can we manage and explain  
577 complex mechanisms of genetic and epigenetic regulations. This result may shed light on functional  
578 mechanisms, which provide useful clues for experiments in the future.

579 We emphasize that our multiscale model is also a useful approximation in study of chromatin  
580 dynamics. Specifically, we modeled chromatin as a polymer and used a generalized Rouse model  
581 to describe the polymer dynamics. Recall that Rouse-type models such as SBS model [66], Rod-  
582 like model, Zimm model, reptation model [67] can also represent a self-avoiding polymer. However,  
583 the Rouse model is suitable for the situation where the environmental effects of entanglement and  
584 crowding are negligible [68]. When modeling the processes of nucleosome modifications and gene

585 transcription, we used a coupled reaction system suitable to the use of the Gillespie algorithm [51].  
586 This implies that we have made the Markovian assumption, that is, the stochastic motion of enzymes  
587 is uninfluenced by previous states, only by the current state. But, in vivo, intracellular biochemical  
588 processes occur, in general, in a memory manner, leading to non-Markovian kinetics [69]. In spite  
589 of the Markov assumption, our model can also be extended to non-Markovian cases.

590 Recently, the work of Michieletto *et al.* [27] on epigenetic recoloring dynamics based on the  
591 potential of the whole system revealed a pathway for the epigenetic information establishment and  
592 heritability. However, their approach cannot accurately dissect the contribution of 1D and 3D  
593 coupling to epigenetic dynamics, thus failing to stress the effects of long-range interaction caused  
594 by the chromatin dynamics. The work of Jost *et al.* [28] based on a LC model stressed the  
595 importance of long-range interaction or chromatin conformation in epigenetic maintenance, but the  
596 proposed method did not consider time explicitly, failing to describe the dynamic processes of  
597 chromatin configuration and epigenetic changes in multiple time scales. In contrast, our model  
598 explicitly considered gene transcription and DNA replication, and provided an effective framework  
599 for analyzing the relationships among epigenetic maintenance, chromatin configuration and gene  
600 transcription.

601 In summary, our model provides a study paradigm for 4D nuclear project even in a more realistic  
602 or complex case. Our findings, which rationalize the mutual effects of spatial folding, epigenetic  
603 modification and gene function on the establishment and maintenance of stable epigenetic cell  
604 memory, provide useful clues for experiments on the impacts of conditions related to epigenetic  
605 chromatin such as histone exchange [16,70-72], cancer therapy [73], apoptosis [74].

606



607 **REFERENCES**

- 608 1 Cavalli, G. & Paro, R. Chromo-domain proteins: linking chromatin structure to  
609 epigenetic regulation. *Curr Opin Cell Biol* **10**, 354-360 (1998).
- 610 2 Bannister, A. J. & Kouzarides, T. Regulation of chromatin by histone modifications.  
611 *Cell Res* **21**, 381-395 (2011).
- 612 3 Reik, W. Stability and flexibility of epigenetic gene regulation in mammalian  
613 development. *Nature* **447**, 425-432 (2007).
- 614 4 Alberts, B. *et al. Molecular biology of the cell.* (2014).
- 615 5 Roth, S. Y., Denu, J. M. & Allis, C. D. Histone acetyltransferases. *Annu Rev of Biochem*  
616 **70**, 81-120 (2001).
- 617 6 De Laat, W. & Duboule, D. Topology of mammalian developmental enhancers and  
618 their regulatory landscapes. *Nature* **502**, 499-506 (2013).
- 619 7 Erdel, F. How communication between nucleosomes enables spreading and epigenetic  
620 memory of histone modifications. *Bioessays* **39**, 1700053 (2017).
- 621 8 Shilatifard, A. Chromatin modifications by methylation and ubiquitination:  
622 implications in the regulation of gene expression. *Annu Rev Biochem* **75**, 243-269  
623 (2006).
- 624 9 Shogren-Knaak, M. *et al.* Histone H4-K16 acetylation controls chromatin structure and  
625 protein interactions. *Science* **311**, 844-847 (2006).
- 626 10 Li, G. & Reinberg, D. Chromatin higher-order structures and gene regulation. *Curr*  
627 *Opin Genet Dev* **21**, 175-186 (2011).
- 628 11 Li, B., Carey, M. & Workman, J. The role of chromatin during transcription. *Cell* **128**,  
629 707-719 (2007).
- 630 12 Spitz, F. & Furlong, E. E. Transcription factors: from enhancer binding to  
631 developmental control. *Nat Rev Genet* **13**, 613-626 (2012).
- 632 13 Bulger, M. & Groudine, M. Functional and mechanistic diversity of distal transcription  
633 enhancers. *Cell* **144**, 327-339 (2011).
- 634 14 Johnstone, C. P., Wang, N. B., Sevier, S. A. & Galloway, K. E. Understanding and  
635 Engineering Chromatin as a Dynamical System across Length and Timescales. *Cell*  
636 *Syst* **11**, 424-448 (2020).
- 637 15 Ghosh, S. K. & Jost, D. How epigenome drives chromatin folding and dynamics,  
638 insights from efficient coarse-grained models of chromosomes. *PLoS Comput Biol* **14**,  
639 e1006159 (2018).
- 640 16 Dion, M. F. *et al.* Dynamics of replication-independent histone turnover in budding  
641 yeast. *Science* **315**, 1405-1408 (2007).
- 642 17 Katan-Khaykovich, Y. & Struhl, K. Dynamics of global histone acetylation and  
643 deacetylation in vivo: rapid restoration of normal histone acetylation status upon  
644 removal of activators and repressors. *Genes Dev* **16**, 743-752 (2002).
- 645 18 Fukaya, T., Lim, B. & Levine, M. Enhancer control of transcriptional bursting. *Cell*  
646 **166**, 358-368 (2016).
- 647 19 Bartman, C. R., Hsu, S. C., Hsiung, C. C., Raj, A. & Blobel, G. A. Enhancer regulation  
648 of transcriptional bursting parameters revealed by forced chromatin looping. *Mol Cell*  
649 **62**, 237-247 (2016).

- 650 20 Donovan, B. T. *et al.* Live-cell imaging reveals the interplay between transcription  
651 factors, nucleosomes, and bursting. *Embo J* **38**, e100809 (2019).
- 652 21 Lammers, N. C., Kim, Y. J., Zhao, J. & Garcia, H. G. A matter of time: Using dynamics  
653 and theory to uncover mechanisms of transcriptional bursting. *Curr Opin Cell Biology*  
654 **67**, 147-157 (2020).
- 655 22 Müller - Ott, K. *et al.* Specificity, propagation, and memory of pericentric  
656 heterochromatin. *Mol Syst Biol* **10**, 746 (2014).
- 657 23 Dodd, I. B., Micheelsen, M. A., Sneppen, K. & Thon, G. Theoretical analysis of  
658 epigenetic cell memory by nucleosome modification. *Cell* **129**, 813-822 (2007).
- 659 24 Sneppen, K., Micheelsen, M. A. & Dodd, I. B. Ultrasensitive gene regulation by  
660 positive feedback loops in nucleosome modification. *Mol Syst Biol* **4**, 182 (2008).
- 661 25 Rao, S. S. *et al.* A 3D map of the human genome at kilobase resolution reveals  
662 principles of chromatin looping. *Cell* **159**, 1665-1680 (2014).
- 663 26 Deng, W. *et al.* Controlling long-Range genomic interactions at a native locus by  
664 targeted tethering of a looping factor. *Cell* **149**, 1233-1244 (2012).
- 665 27 Michieletto, D., Orlandini, E. & Marenduzzo, D. Polymer model with epigenetic  
666 recoloring reveals a pathway for the de novo establishment and 3D organization of  
667 chromatin domains. *Phys Rev X* **6** (2016).
- 668 28 Jost, D. & Vaillant, C. Epigenomics in 3D: importance of long-range spreading and  
669 specific interactions in epigenomic maintenance. *Nucleic Acids Res* **46**, 2252-2264  
670 (2018).
- 671 29 Slutsky, M. & Mirny, L. Kinetics of protein-DNA interaction: facilitated target location  
672 in sequence-dependent potential. *Biophys J* **87**, 4021-4035 (2004).
- 673 30 Karlič, R., Chung, H.-R., Lasserre, J., Vlahoviček, K. & Vingron, M. Histone  
674 modification levels are predictive for gene expression. *Proc Natl Acad Sci USA* **107**,  
675 2926-2931 (2010).
- 676 31 Berry, S., Dean, C. & Howard, M. Slow chromatin dynamics allow polycomb target  
677 genes to filter fluctuations in transcription factor activity. *Cell Syst* **4**, 445-457 e448  
678 (2017).
- 679 32 Dekker, J. *et al.* The 4D nucleome project. *Nature* **549**, 219-226 (2017).
- 680 33 Marti-Renom, M. A. *et al.* Challenges and guidelines toward 4D nucleome data and  
681 model standards. *Nat Genet* **50**, 1352-1358 (2018).
- 682 34 Gardiner, C. W. Handbook of stochastic methods for physics, chemistry and the natural  
683 sciences. (2004).
- 684 35 Bintu, L. *et al.* Dynamics of epigenetic regulation at the single-cell level. *Science* **351**,  
685 720-724 (2016).
- 686 36 Terranova, R. *et al.* Polycomb group proteins Ezh2 and Rnf2 direct genomic  
687 contraction and imprinted repression in early mouse embryos. *Dev Cell* **15**, 668-679  
688 (2008).
- 689 37 Grunstein, M. Yeast heterochromatin: regulation of its assembly and inheritance by  
690 histones. *Cell* **93**, 325-328 (1998).
- 691 38 Turner, B. M. Histone acetylation as an epigenetic determinant of long-term  
692 transcriptional competence. *Cell Mol Life Sci* **54**, 21-31 (1998).

- 693 39 Erdel, F. & Greene, E. C. Generalized nucleation and looping model for epigenetic  
694 memory of histone modifications. *Proceedings of the National Academy of Sciences*  
695 **113**, E4180-E4189 (2016).
- 696 40 Rippe, K. Making contacts on a nucleic acid polymer. *Trends Biochem Sci* **26**, 733-740  
697 (2001).
- 698 41 Hosey, A. M., Chaturvedi, C. P. & Brand, M. Crosstalk between histone modifications  
699 maintains the developmental pattern of gene expression on a tissue-specific locus.  
700 *Epigenetics* **5**, 273-281 (2010).
- 701 42 Aranda, S., Mas, G. & Di Croce, L. Regulation of gene transcription by Polycomb  
702 proteins. *Sci Adv* **1**, e1500737 (2015).
- 703 43 Brookes, E. *et al.* Polycomb associates genome-wide with a specific RNA polymerase  
704 II variant, and regulates metabolic genes in ESCs. *Cell Stem Cell* **10**, 157-170 (2012).
- 705 44 Cao, R. *et al.* Role of histone H3 lysine 27 methylation in Polycomb-group silencing.  
706 *Science* **298**, 1039-1043 (2002).
- 707 45 Lodish, H. *et al.* Molecular cell biology. (2000).
- 708 46 Chen, S. *et al.* The histone H3 Lys 27 demethylase JMJD3 regulates gene expression  
709 by impacting transcriptional elongation. *Genes Dev* **26**, 1364-1375 (2012).
- 710 47 Lee, M. G. *et al.* Demethylation of H3K27 regulates polycomb recruitment and H2A  
711 ubiquitination. *Science* **318**, 447-450 (2007).
- 712 48 Hong, S. *et al.* Identification of JmjC domain-containing UTX and JMJD3 as histone  
713 H3 lysine 27 demethylases. *Proc Natl Acad Sci USA* **104**, 18439-18444 (2007).
- 714 49 Margueron, R. *et al.* Role of the polycomb protein EED in the propagation of repressive  
715 histone marks. *Nature* **461**, 762 (2009).
- 716 50 Tie, F. *et al.* Trithorax monomethylates histone H3K4 and interacts directly with CBP  
717 to promote H3K27 acetylation and antagonize Polycomb silencing. *Development* **141**,  
718 1129-1139 (2014).
- 719 51 Gillespie, D. T. Exact stochastic simulation of coupled chemical reactions. *J Phys*  
720 *Chem* **81**, 2340-2361 (1977).
- 721 52 Posakony, J. W., England, J. M. & Attardi, G. Mitochondrial growth and division during  
722 the cell cycle in HeLa cells. *J Cell Biol* **74**, 468-491 (1977).
- 723 53 Annunziato, A. Split decision: what happens to nucleosomes during DNA replication?  
724 *J Biol Chem* **280**, 12065-12068 (2005).
- 725 54 Noma, K., Allis, C. D. & Grewal, S. I. Transitions in distinct histone H3 methylation  
726 patterns at the heterochromatin domain boundaries. *Science* **293**, 1150-1155 (2001).
- 727 55 Thon, G., Bjerling, P., Bünner, C. M. & Verhein-Hansen, J. Expression-state boundaries  
728 in the mating-type region of fission yeast. *Genetics* **161**, 611-622 (2002).
- 729 56 Sneppen, K. & Dodd, I. B. A simple histone code opens many paths to epigenetics.  
730 *PLoS Comput Biol* **8**, e1002643 (2012).
- 731 57 Schoenfelder, S. & Fraser, P. Long-range enhancer-promoter contacts in gene  
732 expression control. *Nat Rev Genet* **20**, 437-455 (2019).
- 733 58 Hilton, I. B. *et al.* Epigenome editing by a CRISPR-Cas9-based acetyltransferase  
734 activates genes from promoters and enhancers. *Nat Biotechnol* **33**, 510-517 (2015).
- 735 59 Bantignies, F. *et al.* Polycomb-dependent regulatory contacts between distant Hox loci  
736 in *Drosophila*. *Cell* **144**, 214-226 (2011).

- 737 60 Misteli, T. The self-organizing genome: Principles of genome architecture and function.  
738 *Cell* (2020).
- 739 61 Angel, A., Song, J., Dean, C. & Howard, M. A Polycomb-based switch underlying  
740 quantitative epigenetic memory. *Nature* **476**, 105-108 (2011).
- 741 62 Bastow, R. *et al.* Vernalization requires epigenetic silencing of FLC by histone  
742 methylation. *Nature* **427**, 164-167 (2004).
- 743 63 Zhang, X. *et al.* Whole-genome analysis of histone H3 lysine 27 trimethylation in  
744 Arabidopsis. *PLoS Biol* **5**, e129 (2007).
- 745 64 Kiefer, C. M., Hou, C., Little, J. A. & Dean, A. Epigenetics of beta-globin gene  
746 regulation. *Mutat Res* **647**, 68-76 (2008).
- 747 65 Sarkies, P. & Sale, J. E. Cellular epigenetic stability and cancer. *Trends Genet* **28**, 118-  
748 127 (2012).
- 749 66 Barbieri, M. *et al.* Complexity of chromatin folding is captured by the strings and  
750 binders switch model. *Proc Natl Acad Sci USA* **109**, 16173-16178 (2012).
- 751 67 Doi, M. & Edwards, S. The theory of polymer dynamics. (1986).
- 752 68 Zhang, Y. & Dudko, O. K. First-Passage Processes in the Genome. *Annu Rev Biophys*  
753 **45**, 117-134 (2016).
- 754 69 Zhang, J. & Zhou, T. Markovian approaches to modeling intracellular reaction  
755 processes with molecular memory. *Proc Natl Acad Sci USA* **116**, 23542-23550 (2019).
- 756 70 Jamai, A., Imoberdorf, R. M. & Strubin, M. Continuous histone H2B and transcription-  
757 dependent histone H3 exchange in yeast cells outside of replication. *Mol Cell* **25**, 345-  
758 355 (2007).
- 759 71 Deaton, A. M. *et al.* Enhancer regions show high histone H3.3 turnover that changes  
760 during differentiation. *Elife* **5** (2016).
- 761 72 Kraushaar, D. C. *et al.* Genome-wide incorporation dynamics reveal distinct categories  
762 of turnover for the histone variant H3.3. *Genome Biol* **14**, R121 (2013).
- 763 73 Di Cerbo, V. & Schneider, R. Cancers with wrong HATs: the impact of acetylation.  
764 *Brief Funct Genomics* **12**, 231-243 (2013).
- 765 74 Zhang, Y. *et al.* Epigenetic blocking of an enhancer region controls irradiation-induced  
766 proapoptotic gene expression in Drosophila embryos. *Dev Cell* **14**, 481-493 (2008).
